# Supplementary material for: Pitfalls in AR42J-model of cerulein-induced acute pancreatitis
Source: PubMed Central journal article supplement (PMC7833168; doi:10.1371/journal.pone.0242706), 2021-01-25

Figure 2 A1

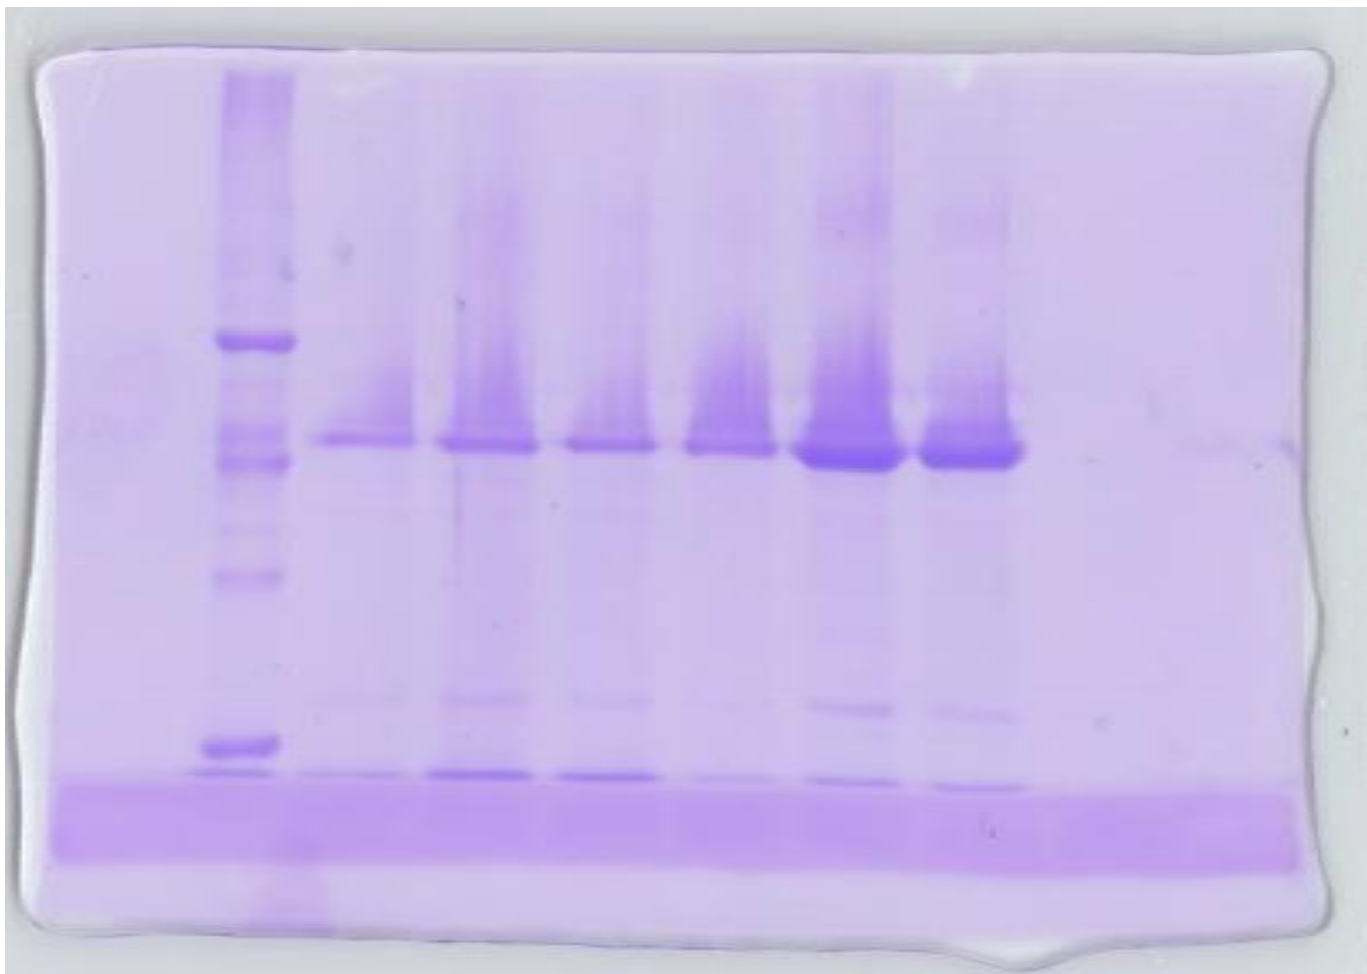

Figure 2 E1  
Amylase

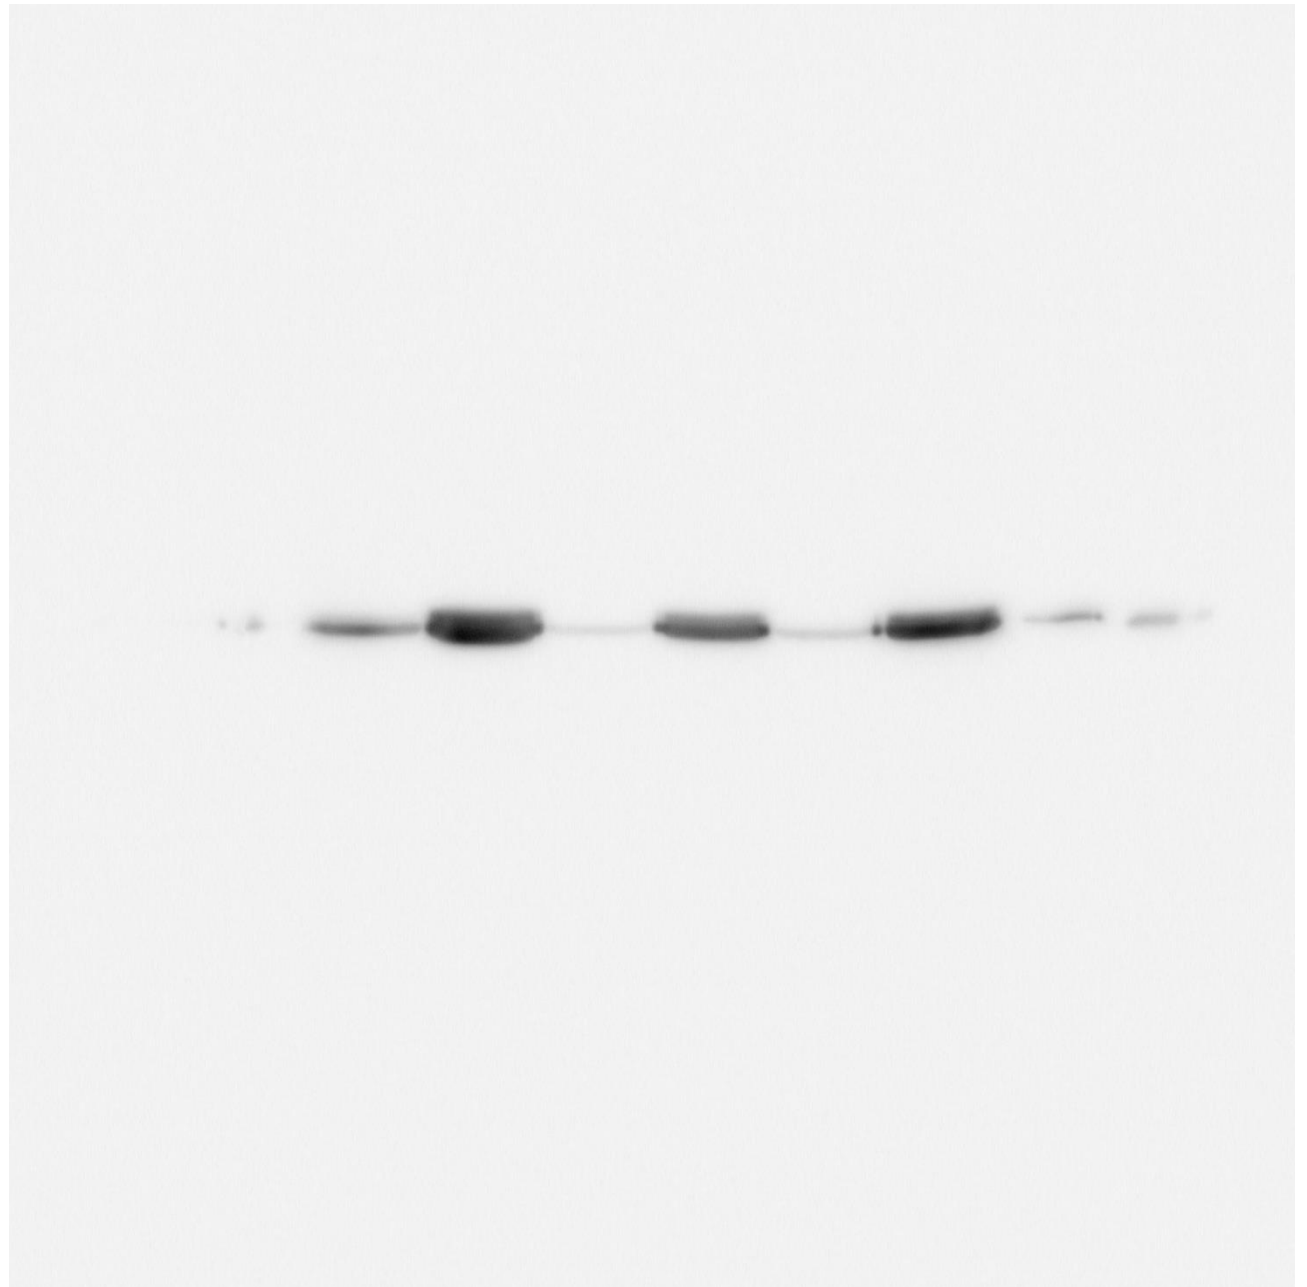

Figure 2 E1  
Lipase

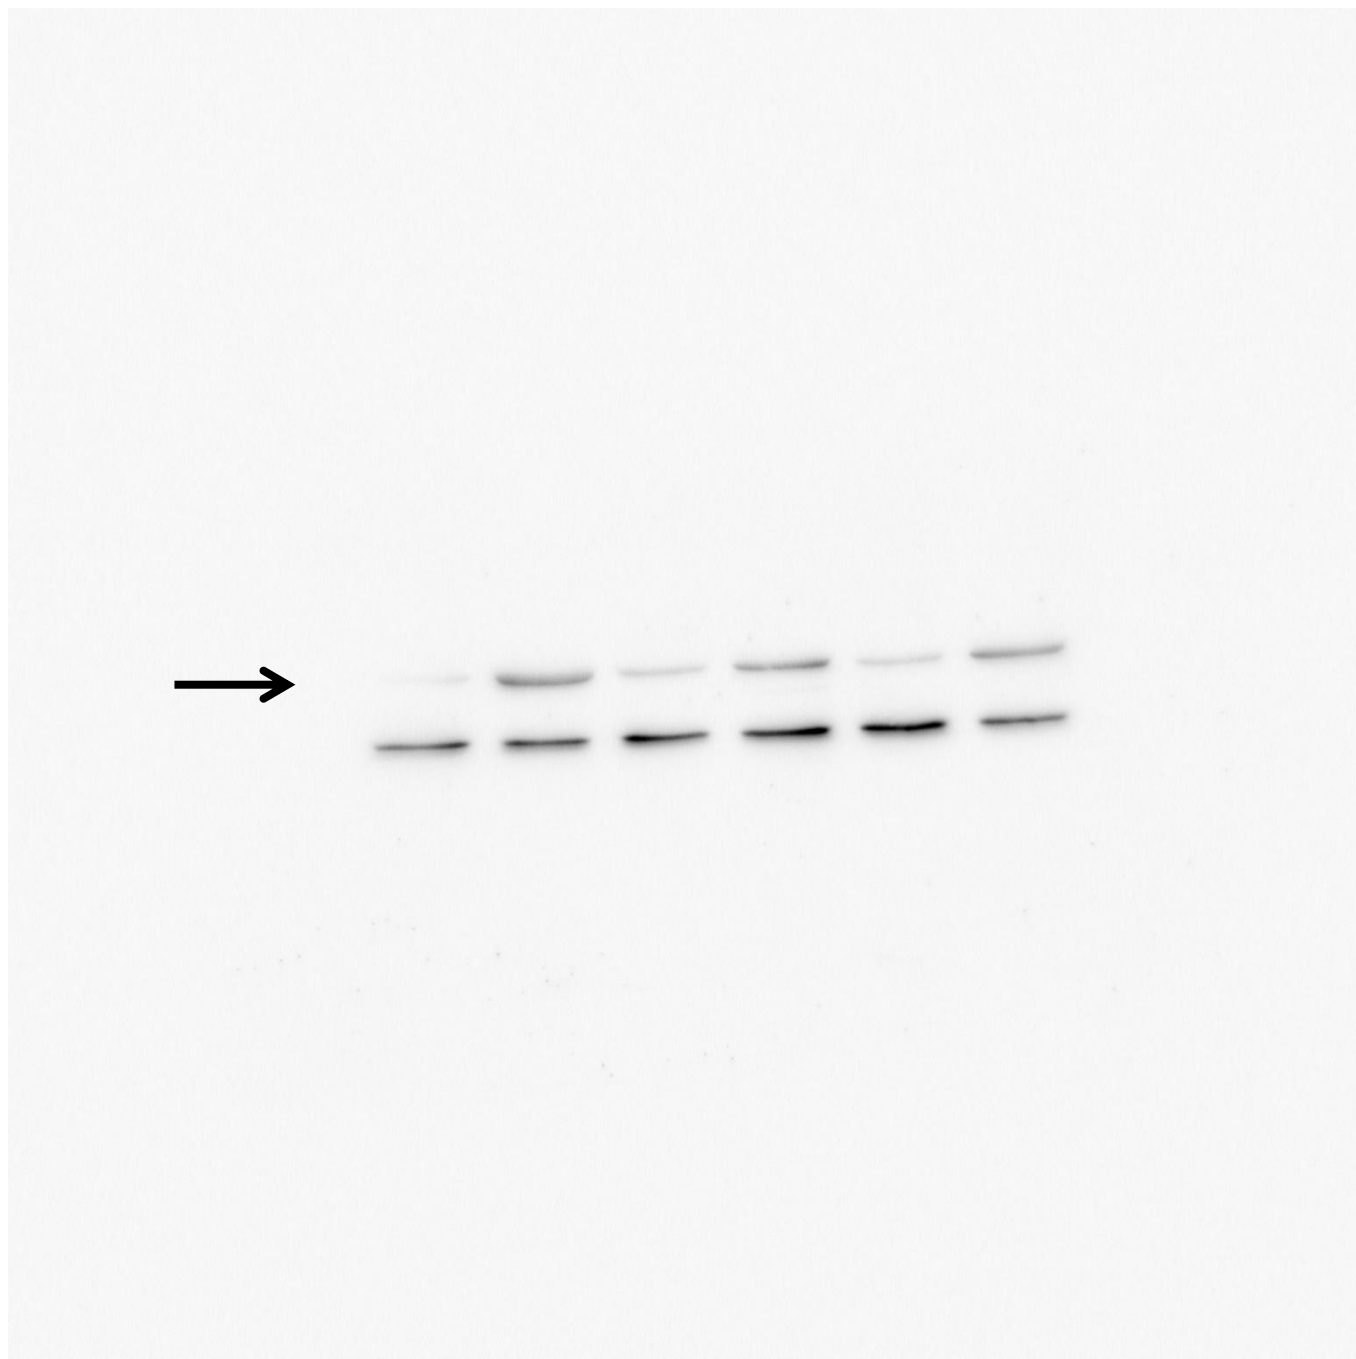

Figure 2 E1  
Vinculin

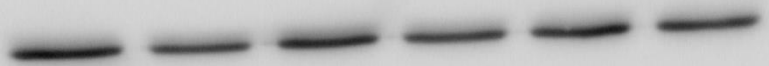

Figure 3 B1  
NF-kB p65

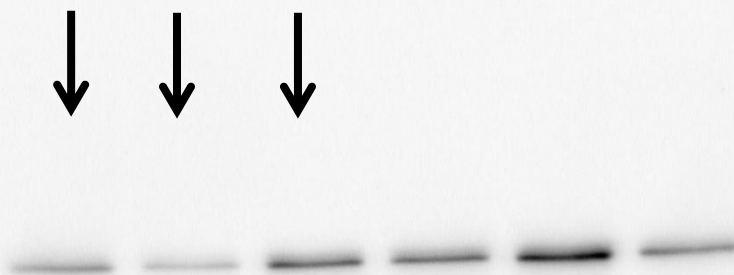

Figure 3 B1  
Vinculin

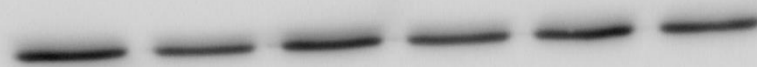

Figure 4 B1  
Glo-I 6h and 12 h

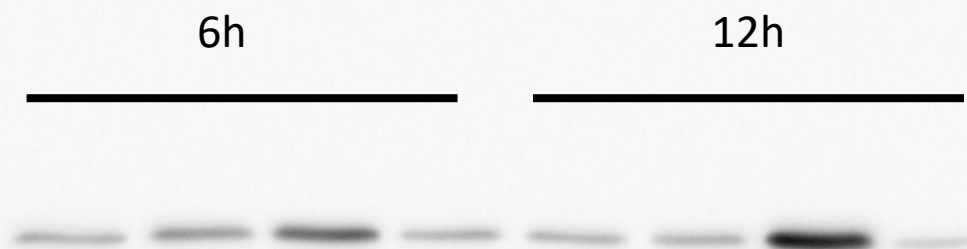

Figure 4 B1  
Glo-I 24h

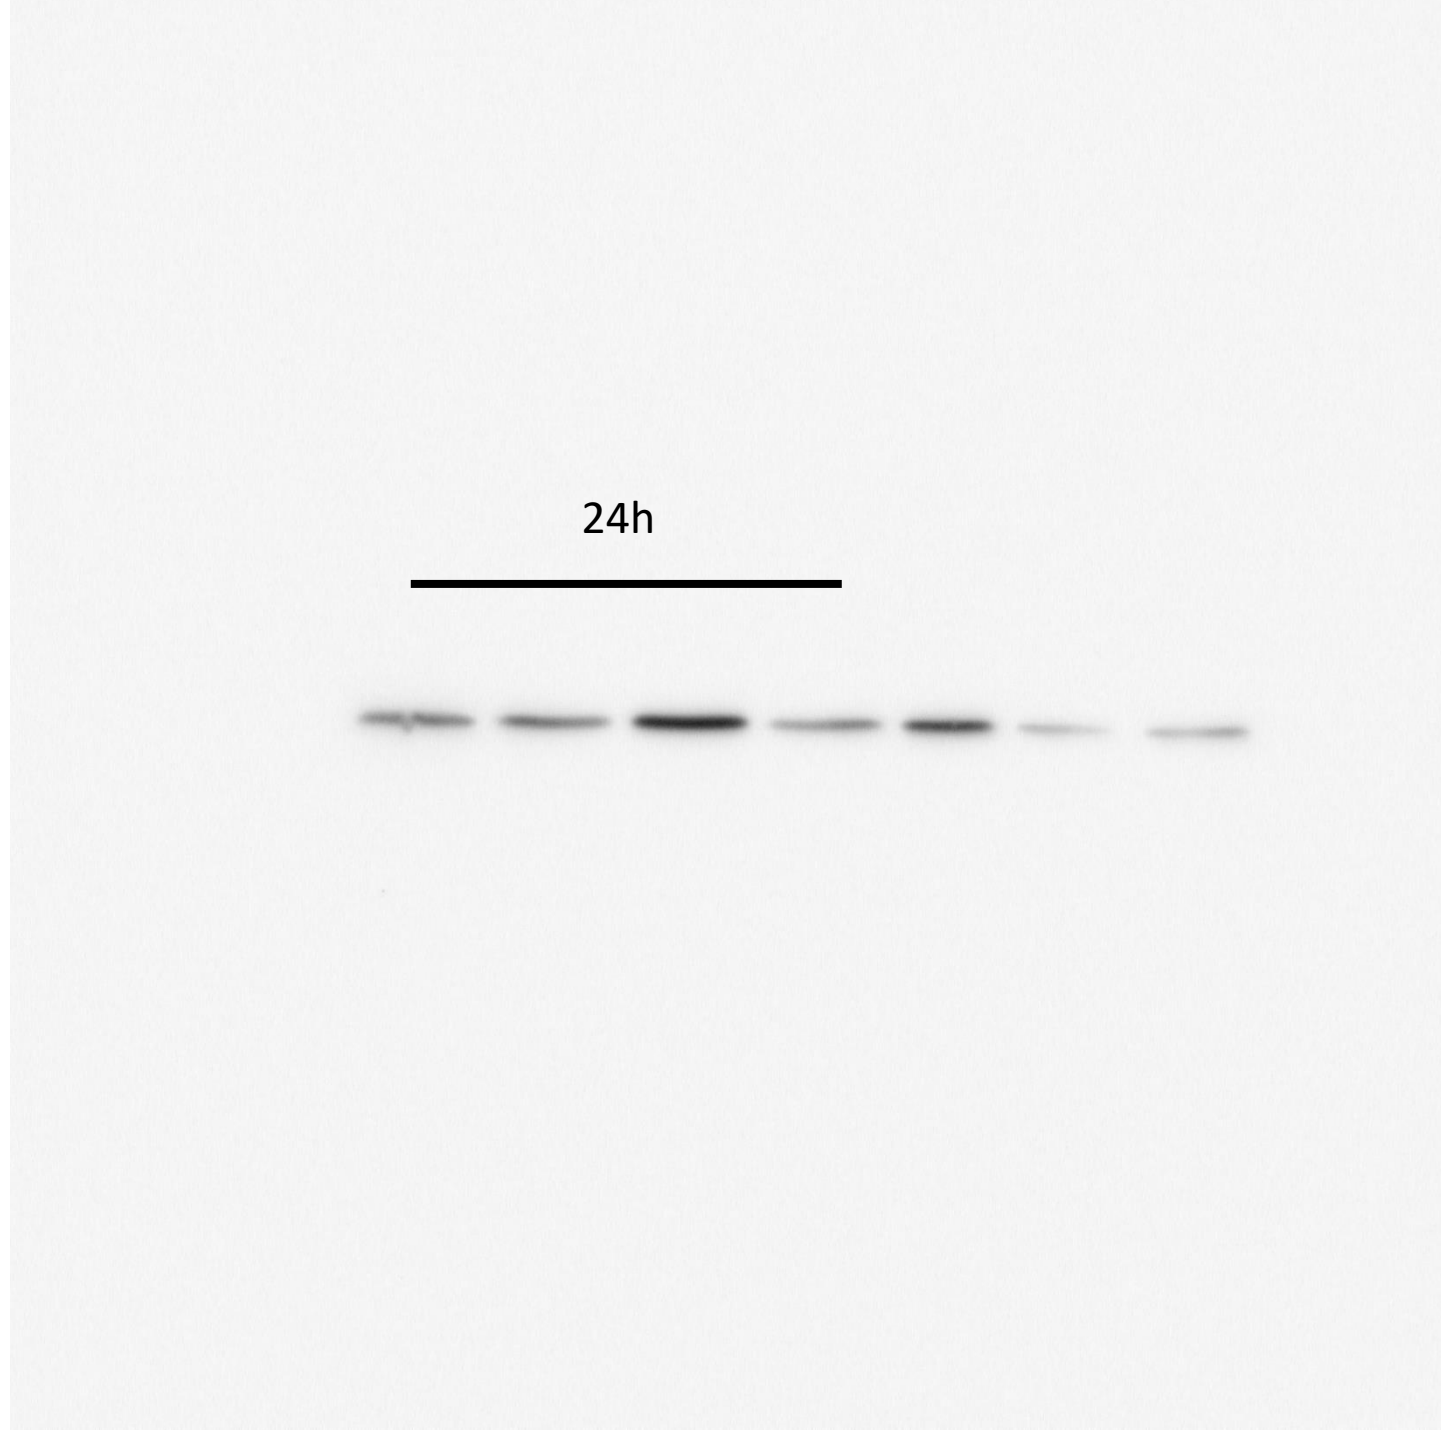



Figure 4 B1  
Vinculin 6h and 12 h

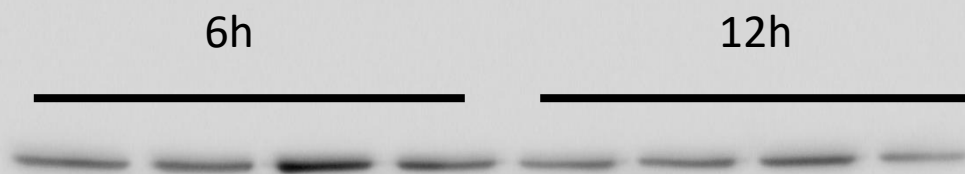

Figure 4 B1  
Vinculin 24 h

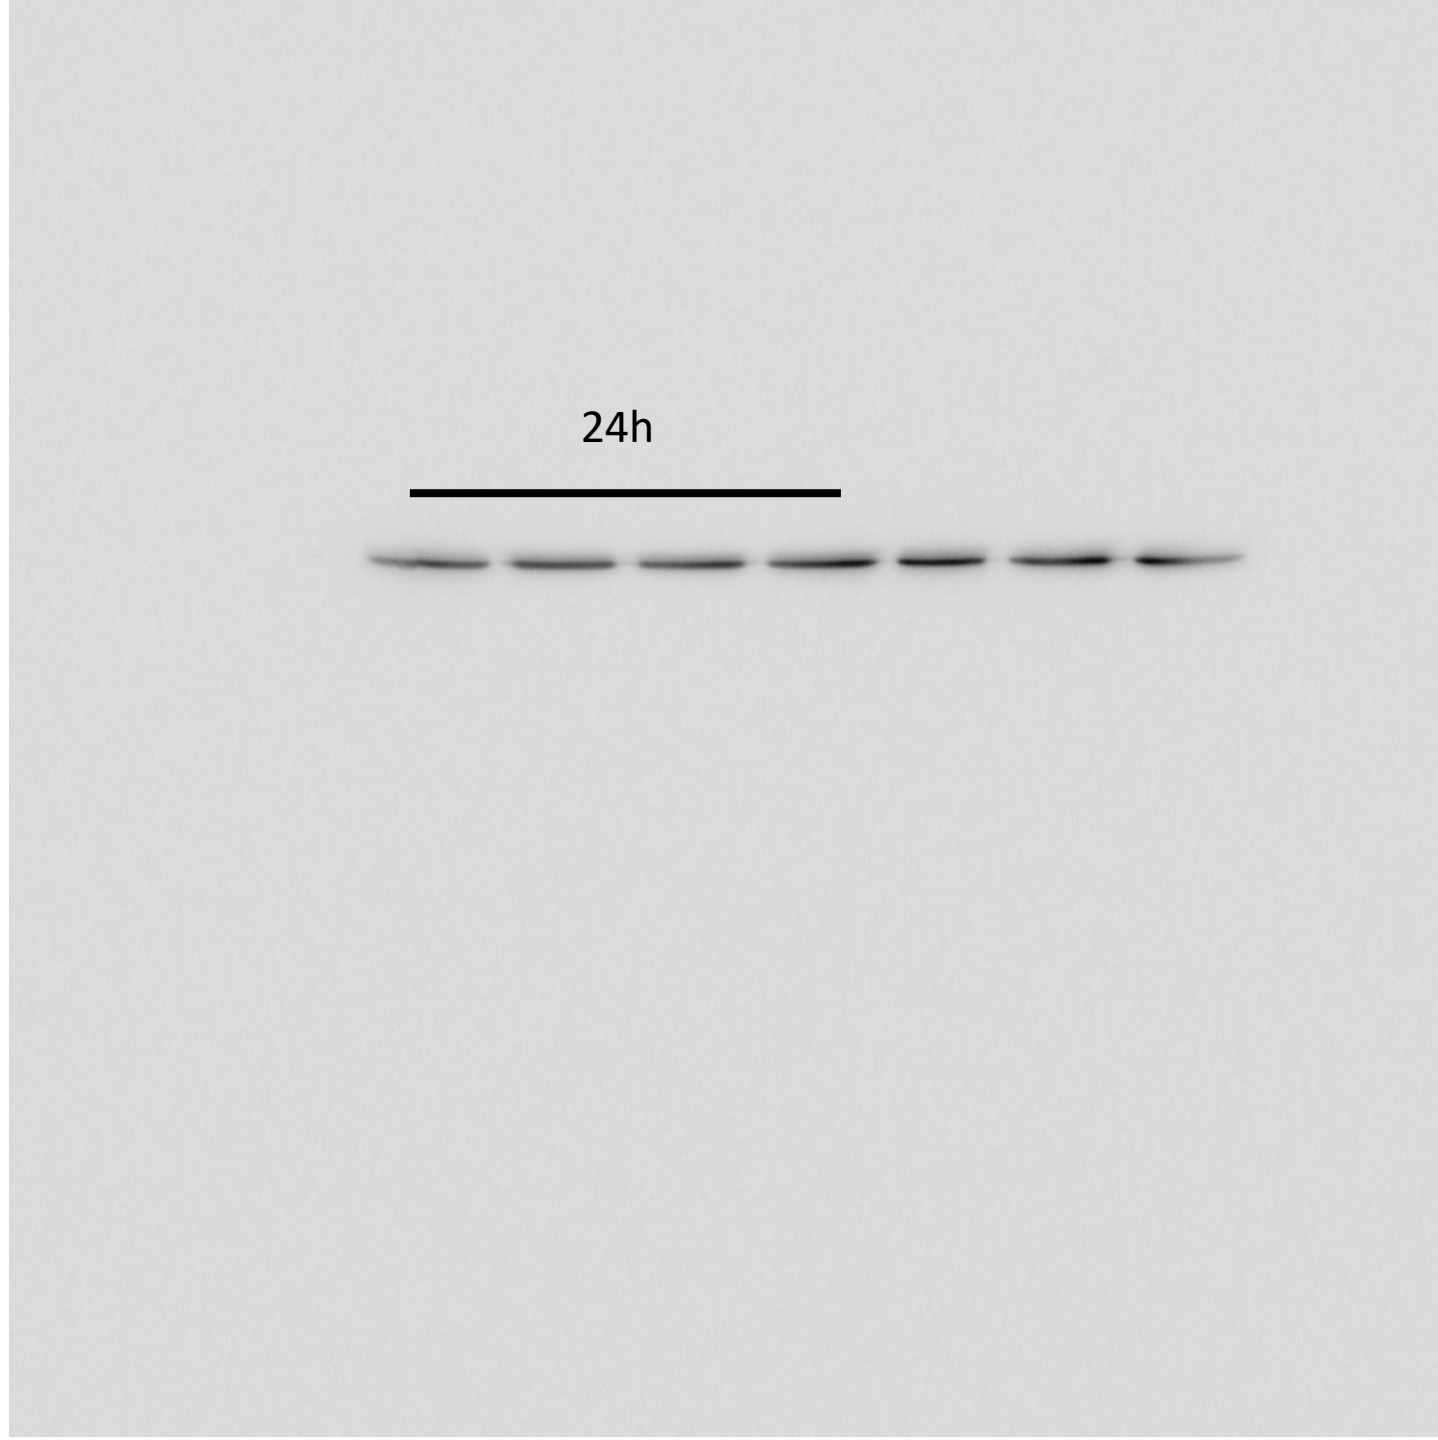

Figure 4 D1  
Glo-I

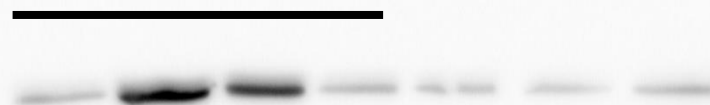

Figure 4 D1  
Vinculin

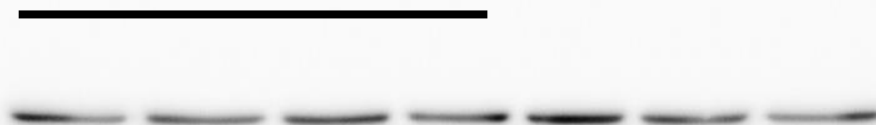

Figure 5 A1  
Glo-I 24h

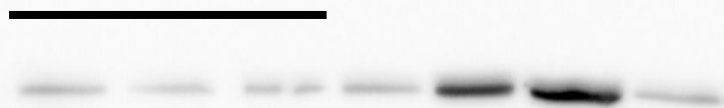

Figure 5 A1  
Vinculin 24h

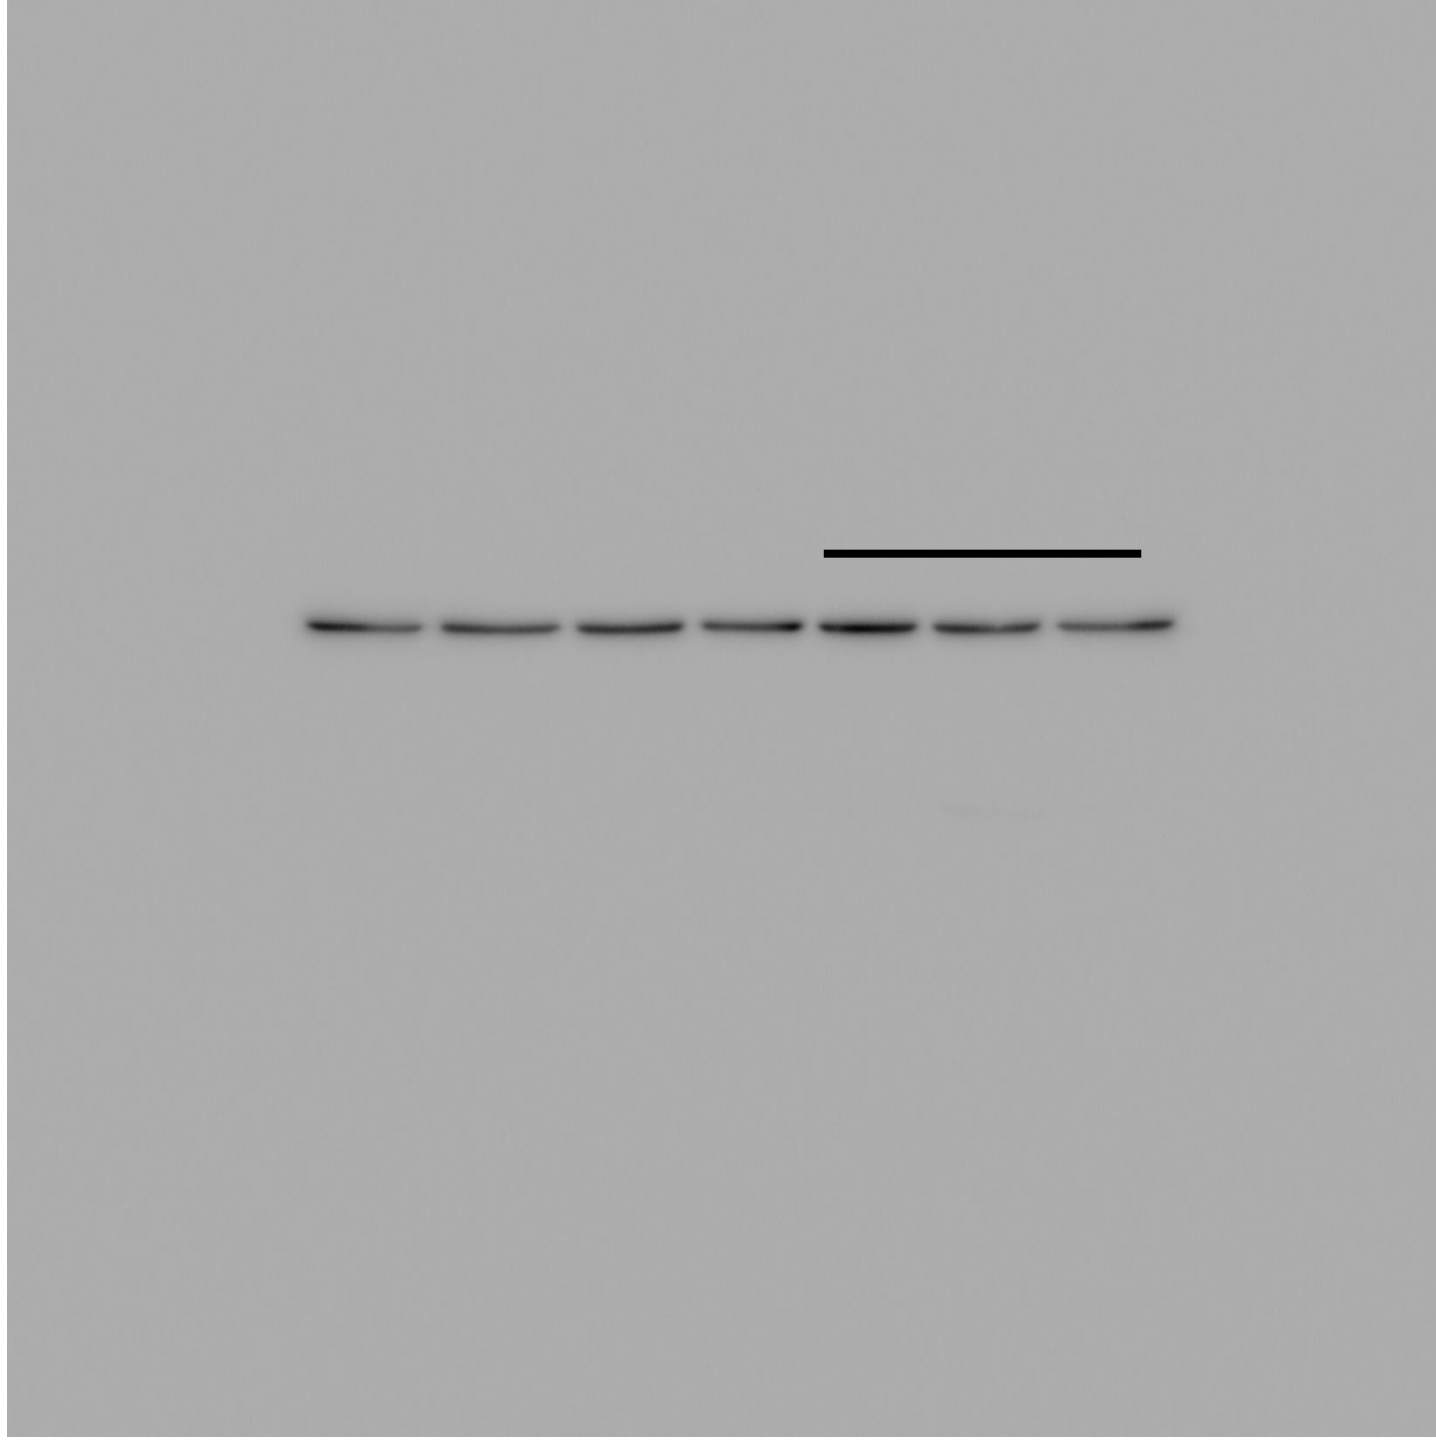

Figure 5 A1  
Glo-I 48h

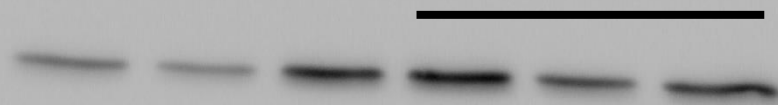

Figure 5 A1  
Vinculin 48h

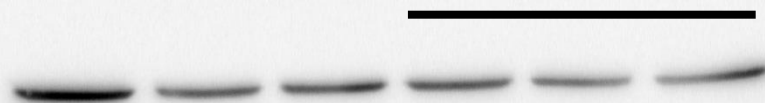



Figure 5 A1  
Glo-I 72h

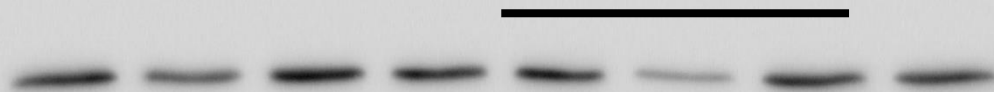

Figure 5 A1  
Vinculin 72h

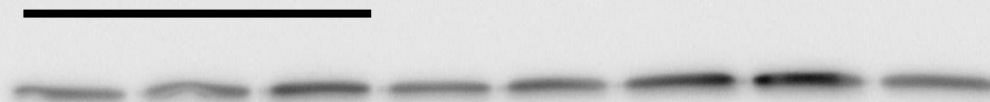

Supplement: pone.0242706.s001.pdf [file pone.0242706.s001.pdf]
